# Supplementary material for: Formation of μ2-hydroxo-bonded (MgPc)2OH− assemblies and (C60−)2 dimers in ionic fullerene {(MgPc)2OH−}2·(C60−)2·(cation+)4 complexes
Source: Royal Society of Chemistry journal article supplement (doi:10.1039/c2dt30701d), 2012-01-01
Supplement: c2dt30701d.pdf [file c2dt30701d.pdf]

**Supporting information.**

**Table S1.** IR-spectra of complexes **1** and **2**.

| Components                                         | <b>1</b>                                                                                                                                                  | <b>2</b>                                                                                                                                                     |
|----------------------------------------------------|-----------------------------------------------------------------------------------------------------------------------------------------------------------|--------------------------------------------------------------------------------------------------------------------------------------------------------------|
| (Mg <sup>II</sup> Pc) <sub>2</sub> OH <sup>-</sup> | 438w<br>502w<br>635w<br>733s<br>749s*<br>777m<br>887m<br>965w<br>1002w<br>1060s<br>1084s*<br>1113s<br>1162m<br>1283m<br>1330s<br>1404m<br>1454m*<br>3047w | 438w<br>502w<br>635w<br>733s<br>749s*<br>777m<br>887m*<br>965w<br>1004w*<br>1060s<br>1086s*<br>1113s*<br>1162m<br>1283m<br>1330s<br>1404m<br>1455m*<br>3033w |
| Cation <sup>+</sup>                                | PMDAE <sup>+</sup><br>657w<br>920w<br>1084s*<br>1145w<br>1307w<br>1454m*<br>2853w<br>2931w                                                                | TMP <sup>+</sup><br>887m*<br>921m<br>950w<br>1004w*<br>1086s*<br>1113s*<br>1455m*<br>2920w                                                                   |
| C <sub>60</sub> <sup>-</sup>                       | C <sub>60</sub> <sup>-</sup><br>525w<br>576s<br>-<br>1390s                                                                                                | C <sub>60</sub> <sup>-</sup><br>527w<br>576s<br>1182w<br>1392s                                                                                               |
| Solvent                                            | C <sub>6</sub> H <sub>5</sub> CN<br>547w<br>685w<br>749s*<br>2223w                                                                                        | C <sub>6</sub> H <sub>5</sub> CN<br>547w<br>687w<br>749s*<br>2223w<br><br>C <sub>6</sub> H <sub>4</sub> Cl <sub>2</sub><br>1032w<br>1455m*                   |

\* - the bands coincided.

### IR-spectra

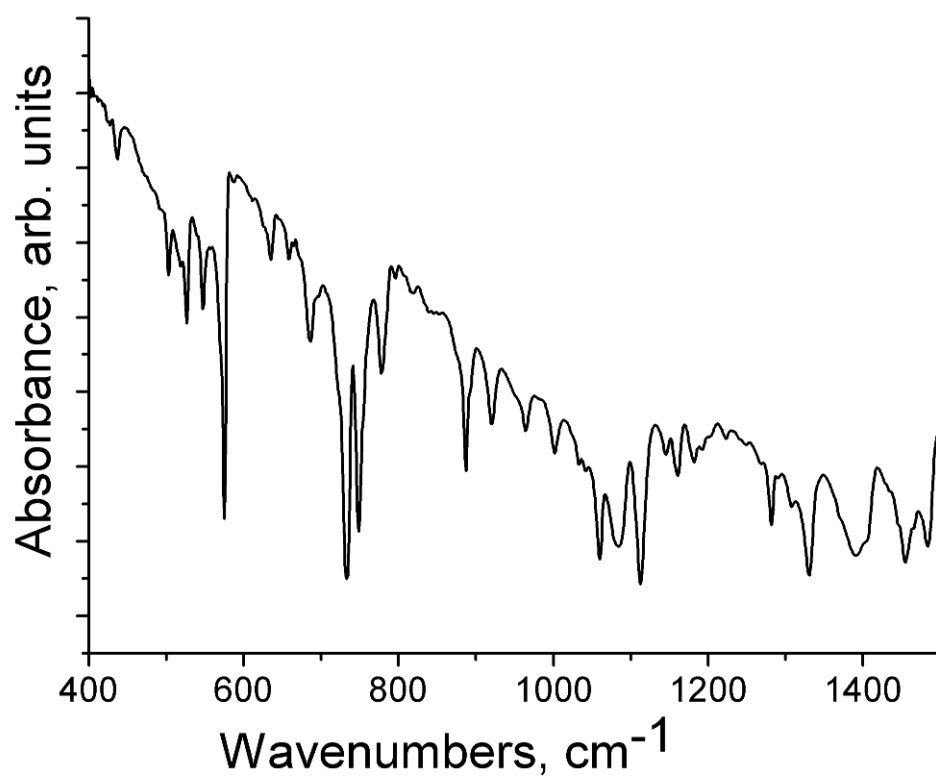

Fig. 1S. IR spectrum of **1** in KBr pellet. Spectrum of **2** is similar.

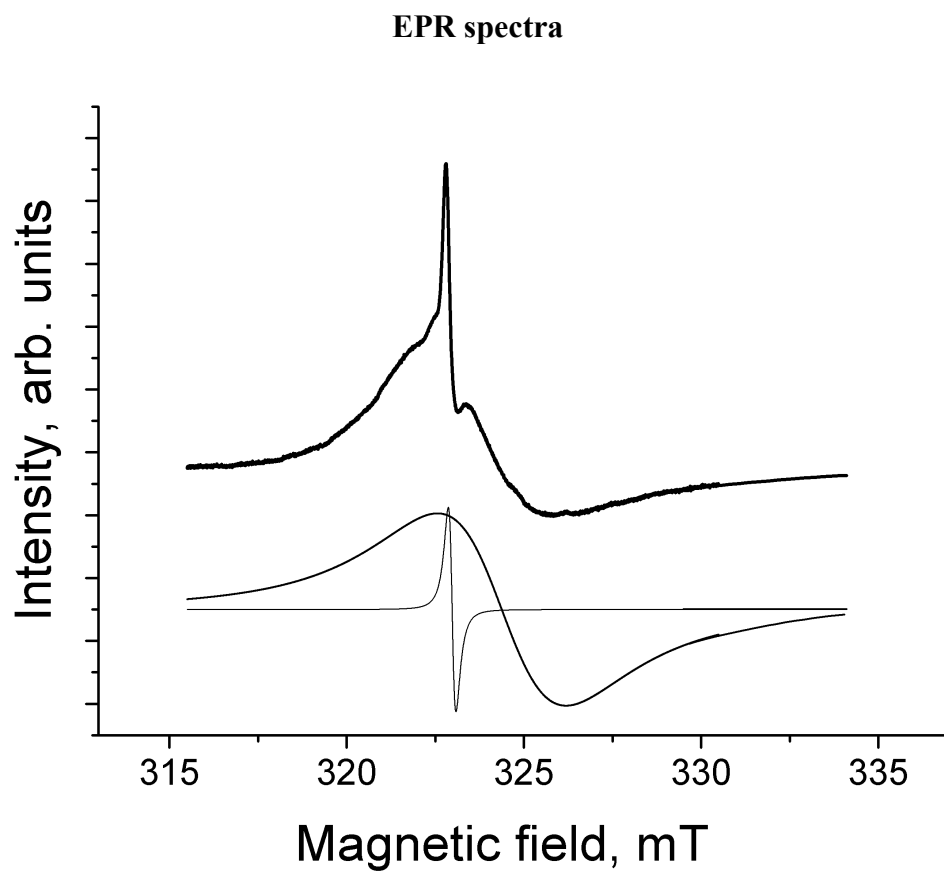

Fig. 2S. EPR spectrum of **1** at room temperature. Below the fitting of signal by two Lorentzian lines is shown (for attribution of the lines see text). Spectrum of **2** is similar.
